# Supplementary material
Source: publisher figshare collection journal article supplement (https://frontiersin.figshare.com/ndownloader/files/30446229)
Supplement: Supplementary file [file 30446229]

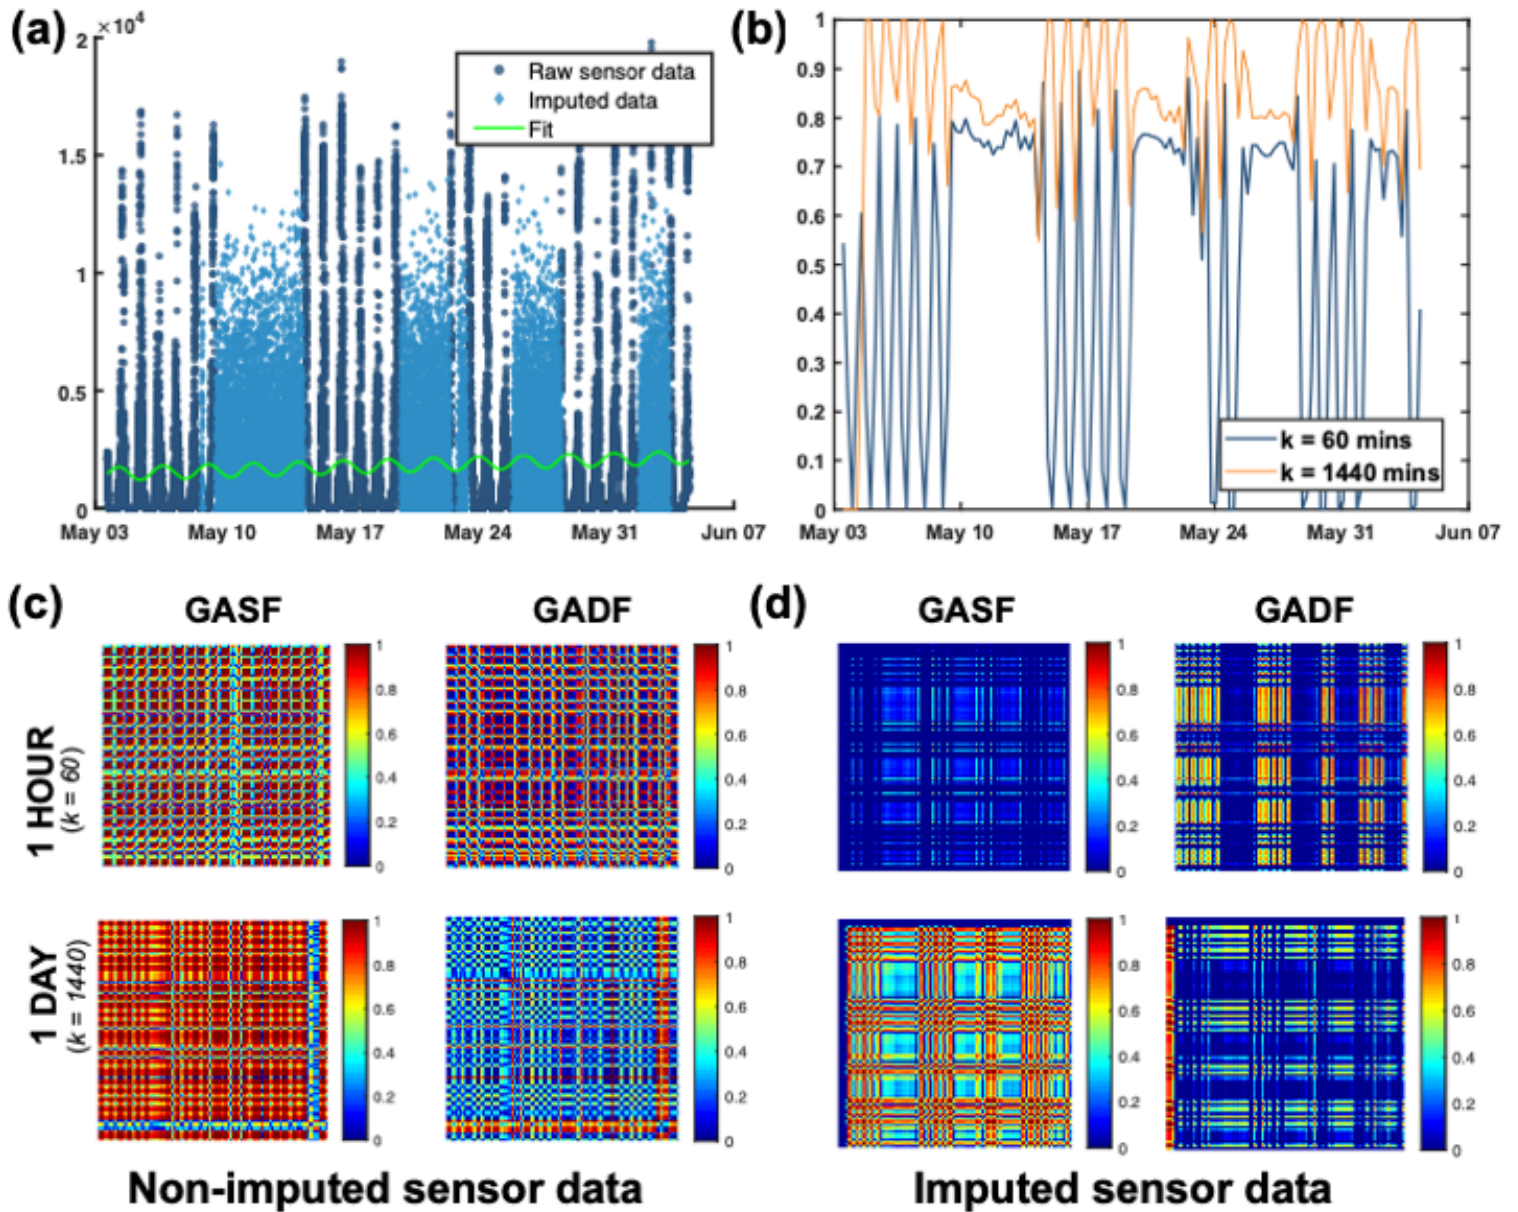

**Supplementary Figure 4. The pre-processing of input data.** This example shows the pre-processing procedure done to the ambient light data in Pot 1, which includes: (a) filling in missing raw sensor values using stochastic regression imputation, (b) normalizing time-series using technical indicators, (c) - (d) tempo-spatial encoding of normalized time-series data using Gramian Angular Summation/Difference Field (GASF/GADF). Using technical indicators such as William's R, we were able to preserve the trends in the normalized time-series dataset.
